# Supplementary material
Source: PubMed Central journal article supplement (PMC3697257)
Supplement: JB.00127-13_zjb999092635so1.pdf [file JB.00127-13_zjb999092635so1.pdf]

# 1 SUPPLEMENTAL MATERIAL

## 2 Supplemental Results

### 3 *hslR* and *hslO* form a $\sigma^{32}$ -dependent operon

4 Our RT-PCR experiments demonstrated that expression of heat shock genes is induced  
5 upon both heat stress and disulfide stress. However, induction by heat shock and by  
6 disulfide stress showed a strikingly different kinetic pattern. We therefore looked in more  
7 detail at the expression of *hslR* and *hslO* using Northern blots. A Northern blot with  
8 specific probes for *hslR* and *hslO* confirmed the increase of heat shock gene transcripts  
9 over time under disulfide stress. A ~1500 b transcript was detected with both probes in all  
10 conditions tested matching to the known  $\sigma^{32}$ -dependent transcript covering both genes  
11 (Fig. S1A) (1). In addition, we detected an individual *hslO* mRNA of ~900 b length with  
12 the *hslO* probe. This RNA could be generated from a predicted  $\sigma^{28}$  promoter (RegulonDB  
13 v. 8.1(2)) or represent a potential posttranscriptional cleavage product of the original  
14 transcript. The other part of this cleavage product would then correspond to the ~600 b  
15 band detected with the *hslR* probe (Fig. S1A).

16

## 17 **Supplemental Materials and Methods**

### 18 **Northern blots**

19 BB7224 and BB7222 were grown aerobically at 30°C in LB medium. When an OD<sub>600</sub> of  
20 0.5 was reached, the cultures were shifted to 43°C to induce heat shock conditions.

21 Disulfide stress was induced by addition of 1 mM diamide to the medium. For RNA  
22 extraction, 1.2 ml of culture were harvested on 600 µl ice cold killing buffer (20 mM  
23 NaN<sub>3</sub>, 5 mM MgCl<sub>2</sub>, 20 mM TRIS/HCl pH7.5) and the RNA was extracted using the  
24 RNEasy mini kit (Qiagen, Valencia, CA) according to the protocol provided by the  
25 manufacturer. Biotin-labeled probes to detect selected mRNAs (Table S2) were derived  
26 from double stranded DNA using the BrightStar Psoralen-Biotin Nonisotopic Labeling  
27 Kit (Ambion Inc., Austin, TX) according to the protocol provided. The DNA was  
28 obtained in a PCR using primers listed in Table S2 and chromosomal *E. coli* DNA as the  
29 template (3).

30 5 µg sample RNA was denatured at 55°C in 50% (v/v) formamide, 7% (v/v)  
31 formaldehyde, 5 mM sodium acetate, 1 mM EDTA, 20 mM MOPS pH 7.0, supplemented  
32 with 0.4 mg/ml bromophenol blue, 0.4 mg/ml xylene cyanol, 2.5% ficoll 400 and loaded  
33 onto a denaturing agarose gel (1.5% (w/v) agarose, 5 mM sodium acetate, 1 mM EDTA,  
34 2.15% formaldehyde, 10 mM MOPS pH 7.0). The gel was run at 4 V/cm electrode  
35 distance. To analyze the quality of the RNA, to later verify the blotting efficiency and to  
36 normalize the northern signal to the total amount of RNA, the gel was stained with  
37 ethidium bromide staining solution (0.5% (w/v) ethidium bromide in 5 mM sodium  
38 acetate, 1 mM EDTA, 20 mM MOPS).

39 RNA was transferred via capillary blotting onto a Hybond N+™ nylon membrane  
40 (Amersham Biosciences, Piscataway, NJ) using 20 x SSC (0.3 M trisodium citrate, 3 M  
41 NaCl) as the transfer buffer. Then, the RNA was heat crosslinked to the membrane for 1  
42 h at 80°C. The blots were placed into hybridization tubes and incubated in 5 ml  
43 Denhardt's buffer (5x SSC, 0.5% (w/v) SDS, 0.1% (w/v) ficoll 400, 0.1% (w/v) bovine  
44 serum albumine, 0.1% (w/v) polyvinylpyrrolidone) at 67.5°C for 1 h using a rotisserie  
45 oven. RNA was probed by adding 0.5 pmol of the relevant biotinylated probe to the  
46 prehybridization solution and by further incubation at 67.5°C overnight. Hybridization  
47 was detected using the BrightStar BioDetect Kit (Ambion Inc., Austin, TX) according to  
48 the manufacturer's protocol.

49

50 **Supplemental Figures**

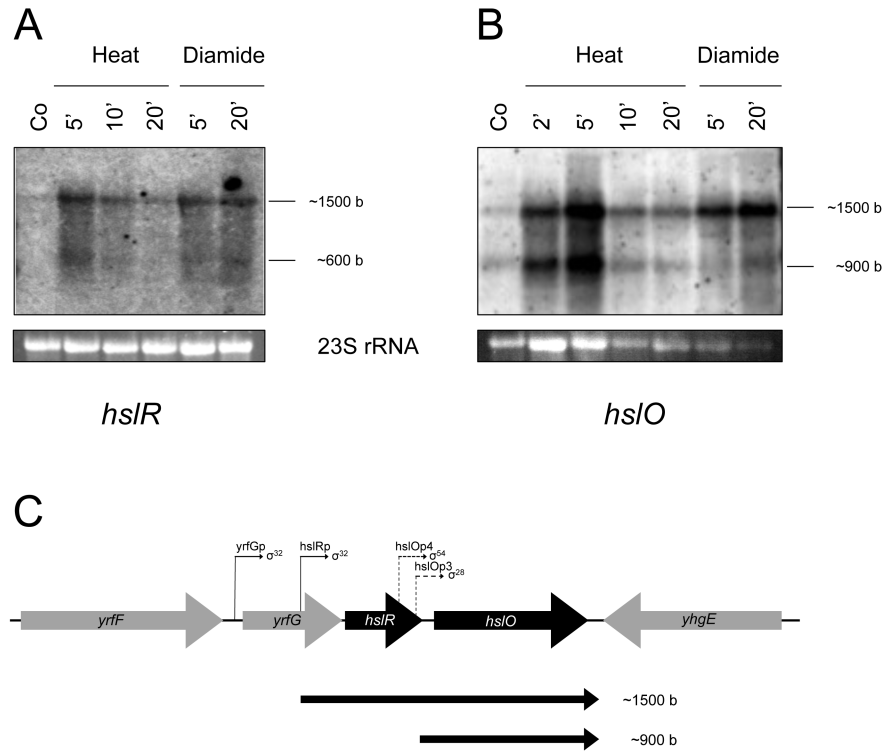

51

52 **Figure S1: Expression of the *E. coli hslRO* operon.** (A) *hslO* and (B) *hslR* are induced  
 53 upon heat shock and diamide-induced disulfide stress in LB media. (C) Probes for *hslO*  
 54 and *hslR* hybridize to a transcript of a length of about 1500 bases, indicating that *hslR* and  
 55 *hslO* are cotranscribed and form a bicistronic operon. Smaller *hslR* and *hslO* transcripts  
 56 of ~600 b (A) and ~ 900 b (B), respectively, indicate processing of the mRNA or  
 57 additional transcription start sites.

58

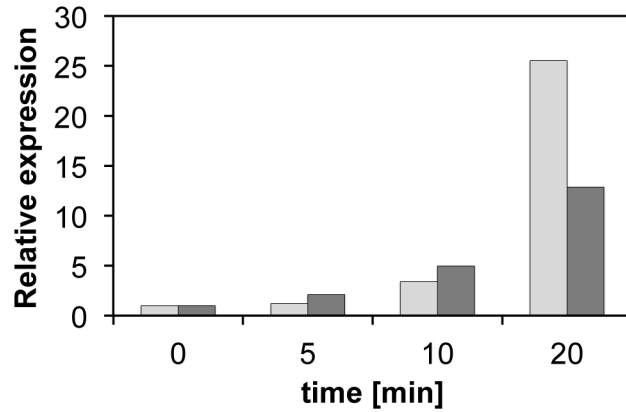

59

60 **Figure S2: Normalization of *hslR* expression using *accD* and *phoP* as reference**  
61 **genes.**

62 The expression of *hslR* upon disulfide stress was analyzed by normalization against  
63 expression of *accD* (light grey) and *phoP* (dark gray). Additional primers used for this  
64 experiment are listed in supplemental Table S3.

65

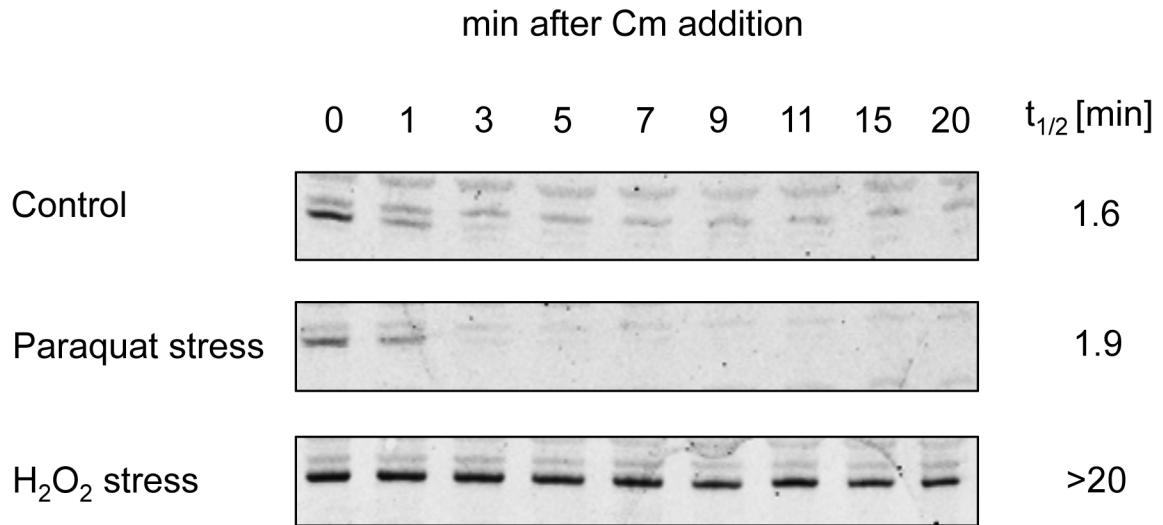

66

67

68 **Figure S3: Stability of RpoH upon paraquat and H<sub>2</sub>O<sub>2</sub> treatment.** Expression of  
 69 RpoH was induced by addition of 1 mM IPTG. Paraquat (250  $\mu$ M) and H<sub>2</sub>O<sub>2</sub> (4 mM)  
 70 were added after 5 minutes and 15 minutes, respectively. Protein synthesis was blocked  
 71 after a total of 25 minutes by the addition of 200  $\mu$ g/mL chloramphenicol. Stability of  
 72 RpoH was determined as described in Materials and Methods in the main manuscript.

73

74 **Supplemental Tables**75 **Table S1: Quality control of RNA and cDNA**

|                                                | #1              |                 |                             | #2              |                 |                             |
|------------------------------------------------|-----------------|-----------------|-----------------------------|-----------------|-----------------|-----------------------------|
| <b>RNA</b>                                     | <b>A260/280</b> | <b>A260/230</b> | <b>ng/<math>\mu</math>L</b> | <b>A260/280</b> | <b>A260/230</b> | <b>ng/<math>\mu</math>L</b> |
| WT control                                     | 2.11            | 2.12            | 207.6                       | 2.12            | 2.17            | 225.5                       |
| WT heat 5 mins                                 | 2.13            | 2.23            | 239.6                       | 2.04            | 2.15            | 242.8                       |
| WT heat 10 mins                                | 2.10            | 2.19            | 315.1                       | 2.12            | 2.10            | 324.6                       |
| WT heat 20 mins                                | 2.12            | 2.25            | 411.2                       | 2.11            | 2.24            | 329.5                       |
| WT diamide 5 mins                              | 2.12            | 2.16            | 253.9                       | 2.11            | 2.12            | 249.9                       |
| WT diamide 10 mins                             | 2.11            | 2.24            | 265.1                       | 2.12            | 2.08            | 214.2                       |
| WT diamide 20 mins                             | 2.11            | 2.18            | 257.7                       | 2.10            | 1.98            | 263.5                       |
| <i><math>\Delta</math>rpoH</i> control         | 2.12            | 2.04            | 143.6                       | 2.11            | 2.08            | 234.5                       |
| <i><math>\Delta</math>rpoH</i> heat 5 mins     | 2.12            | 2.08            | 194.1                       | 2.10            | 2.07            | 213.4                       |
| <i><math>\Delta</math>rpoH</i> heat 10 mins    | 2.12            | 1.98            | 204.8                       | 2.10            | 2.07            | 256.3                       |
| <i><math>\Delta</math>rpoH</i> heat 20 mins    | 2.13            | 1.98            | 287.9                       | 2.10            | 2.01            | 242.5                       |
| <i><math>\Delta</math>rpoH</i> diamide 5 mins  | 2.12            | 1.99            | 176.6                       | 2.11            | 2.01            | 212.4                       |
| <i><math>\Delta</math>rpoH</i> diamide 10 mins | 2.12            | 2.04            | 155.5                       | 2.12            | 2.03            | 205.3                       |
| <i><math>\Delta</math>rpoH</i> diamide 20 mins | 2.15            | 2.01            | 159.0                       | 2.13            | 2.05            | 189.4                       |
| <b>cDNA</b>                                    |                 |                 |                             |                 |                 |                             |
| WT control                                     | 1.78            | 2.06            | 886.1                       | 1.79            | 1.93            | 691.8                       |
| WT heat 5 mins                                 | 1.82            | 1.97            | 875.3                       | 1.79            | 1.94            | 679.7                       |
| WT heat 10 mins                                | 1.80            | 2.02            | 853.6                       | 1.79            | 1.93            | 691.8                       |
| WT heat 20 mins                                | 1.76            | 1.80            | 456.9                       | 1.79            | 1.94            | 696.0                       |
| WT diamide 5 mins                              | 1.76            | 2.12            | 791.4                       | 1.80            | 1.93            | 729.6                       |
| WT diamide 10 mins                             | 1.82            | 1.98            | 842.6                       | 1.80            | 1.92            | 701.1                       |
| WT diamide 20 mins                             | 1.77            | 2.05            | 814.0                       | 1.78            | 1.90            | 699.5                       |
| <i><math>\Delta</math>rpoH</i> control         | 1.81            | 1.99            | 646.8                       | 1.78            | 1.98            | 734.3                       |

|                               |      |      |       |      |      |       |
|-------------------------------|------|------|-------|------|------|-------|
| $\Delta rpoH$ heat 5 mins     | 1.81 | 2.01 | 679.6 | 1.78 | 1.99 | 673.2 |
| $\Delta rpoH$ heat 10 mins    | 1.81 | 2.01 | 677.4 | 1.84 | 1.97 | 698.6 |
| $\Delta rpoH$ heat 20 mins    | 1.80 | 2.03 | 713.8 | 1.79 | 2.05 | 710.4 |
| $\Delta rpoH$ diamide 5 mins  | 1.82 | 2.01 | 645.4 | 1.85 | 2.03 | 712.3 |
| $\Delta rpoH$ diamide 10 mins | 1.81 | 1.98 | 631.6 | 1.81 | 1.86 | 731.3 |
| $\Delta rpoH$ diamide 20 mins | 1.83 | 1.97 | 697.8 | 1.81 | 2.01 | 659.5 |

76

77



78 **Table S2 Primers used for Northern-Blot probe generation**

| <b>Primer</b>       | <b>Sequence</b>             | 79 |
|---------------------|-----------------------------|----|
| <i>hslO</i> forward | CATATGATTATGCCGCAACATGACC   | 80 |
| <i>hslO</i> reverse | GGATCCTCATTAATGAACTTGCGGATC | 81 |
| <i>hslR</i> for     | ATGAAAGAGAAACCTGCTG         | 82 |
| <i>hslR</i> rev     | TTATTCAGTGCCTGCGTG          | 83 |
| <i>dnaJ</i> for     | ATGGCTAAGCAAGATTATTAC       | 84 |
| <i>dnaJ</i> rev     | TAGCGGGTCAGGTCGTC           | 85 |
|                     |                             | 86 |

87

88 **Table S3 Primers used for RT-PCR control gene comparison**

| Primer | Sequence                  |
|--------|---------------------------|
| phoP_F | ACATATACCGGATATTGCGATTGTC |
| phoP_R | CGGTTTAGTCACATAATCATCAGCA |

93

94 **Supplemental References**

- 95 1. **Nonaka G, Blankschien M, Herman C, Gross CA, Rhodius VA.** 2006. Regulon  
96 and promoter analysis of the *E. coli* heat-shock factor,  $\sigma^{32}$ , reveals a  
97 multifaceted cellular response to heat stress. *Genes Dev.* **20**:1776–1789.
- 98 2. **Salgado H, Peralta-Gil M, Gama-Castro S, Santos-Zavaleta A, Muñiz-**  
99 **Rascado L, García-Sotelo JS, Weiss V, Solano-Lira H, Martínez-Flores I,**  
100 **Medina-Rivera A, Salgado-Osorio G, Alquicira-Hernández S, Alquicira-**  
101 **Hernández K, López-Fuentes A, Porrón-Sotelo L, Huerta AM, Bonavides-**  
102 **Martínez C, Balderas-Martínez YI, Pannier L, Olvera M, Labastida A,**  
103 **Jimenez-Jacinto V, Vega-Alvarado L, Del Moral-Chávez V, Hernández-**  
104 **Alvarez A, Morett E, Collado-Vides J.** 2013. RegulonDB v8.0: omics data sets,  
105 evolutionary conservation, regulatory phrases, cross-validated gold standards  
106 and more. *Nucleic Acids Res.* **41**:D203–D213.
- 107 3. **Rozen S, Skaletsky H.** 2000. Primer3 on the WWW for general users and for  
108 biologist programmers. *Methods Mol. Biol.* **132**:365–386.

109
